# Supplementary material for: Aptamer targeting EGFRvIII mutant hampers its constitutive autophosphorylation and affects migration, invasion and proliferation of glioblastoma cells
Source: PubMed Central journal article supplement (PMC4741949; doi:10.18632/oncotarget.6066), 2015-10-10
Supplement: oncotarget-06-37570-s001.pdf [file oncotarget-06-37570-s001.pdf]

# Aptamer targeting EGFRvIII mutant hampers its constitutive autophosphorylation and affects migration, invasion and proliferation of glioblastoma cells

## Supplementary Material

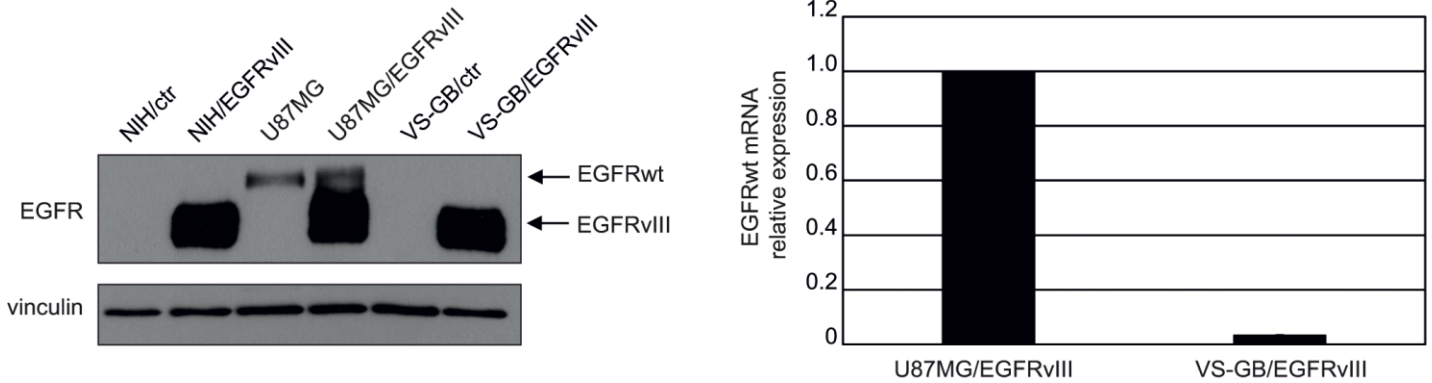

**Figure S1: EGFRvIII expression in transfected cell lines.** Left, lysates from NIH/EGFRvIII, U87MG/EGFRvIII and VS-GB/EGFRvIII cells and vector-transfected control cells were immunoblotted with anti-EGFR antibody. Equal loading was confirmed by immunoblot with anti-vinculin antibody. Endogenous EGFRwt of 170 kDa and exogenous EGFRvIII of 140-155 kDa are indicated by the arrow. Right, EGFRwt mRNA levels were analyzed by RT-qPCR and reported as relative to U87MG/EGFRvIII cells.

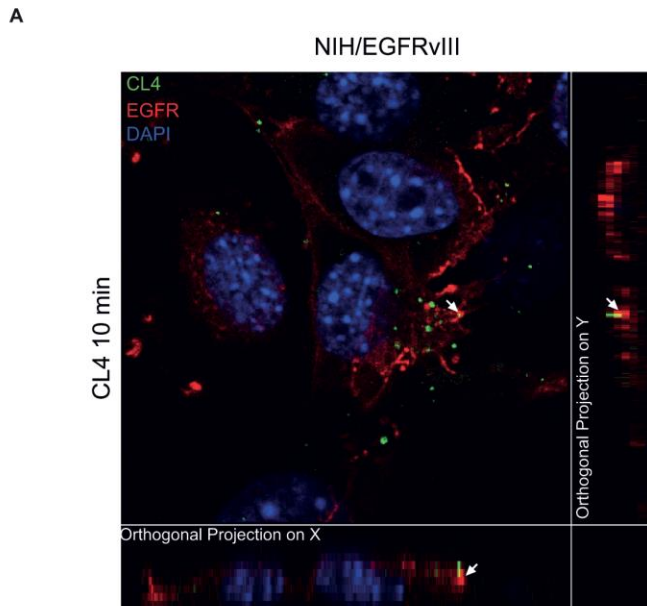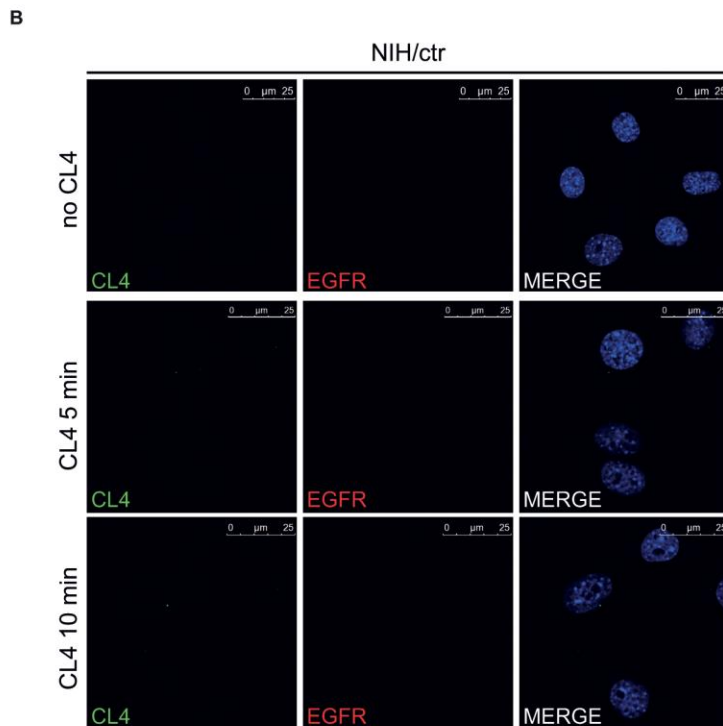

**Figure S2: CL4 colocalization with EGFRvIII.** (A) NIH/EGFRvIII cells were incubated with 2.5  $\mu\text{mol/l}$  FAM-labelled CL4 for 10 minutes and then fixed and labelled with anti - EGFR antibody without permeabilization. A single focus “XY” from a Z-stack is shown indicating the plane in which CL4 and EGFRvIII colocalization occurred. Orthogonal projections of X and Y axis are also shown to highlight that colocalization occurred at membrane level. White arrows indicate the colocalization punctum between CL4 and EGFRvIII. (B) NIH/ctr cells were incubated with 2.5  $\mu\text{mol/l}$  FAM-labelled CL4 for 5 and 10 minutes. Cells were fixed and labelled with anti - EGFR antibody without permeabilization. CL4, EGFRvIII and nuclei are visualized in green, red and blue, respectively.

A

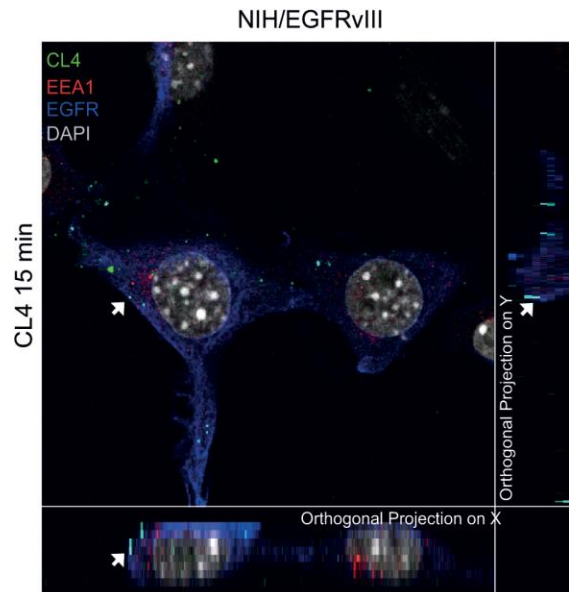

B

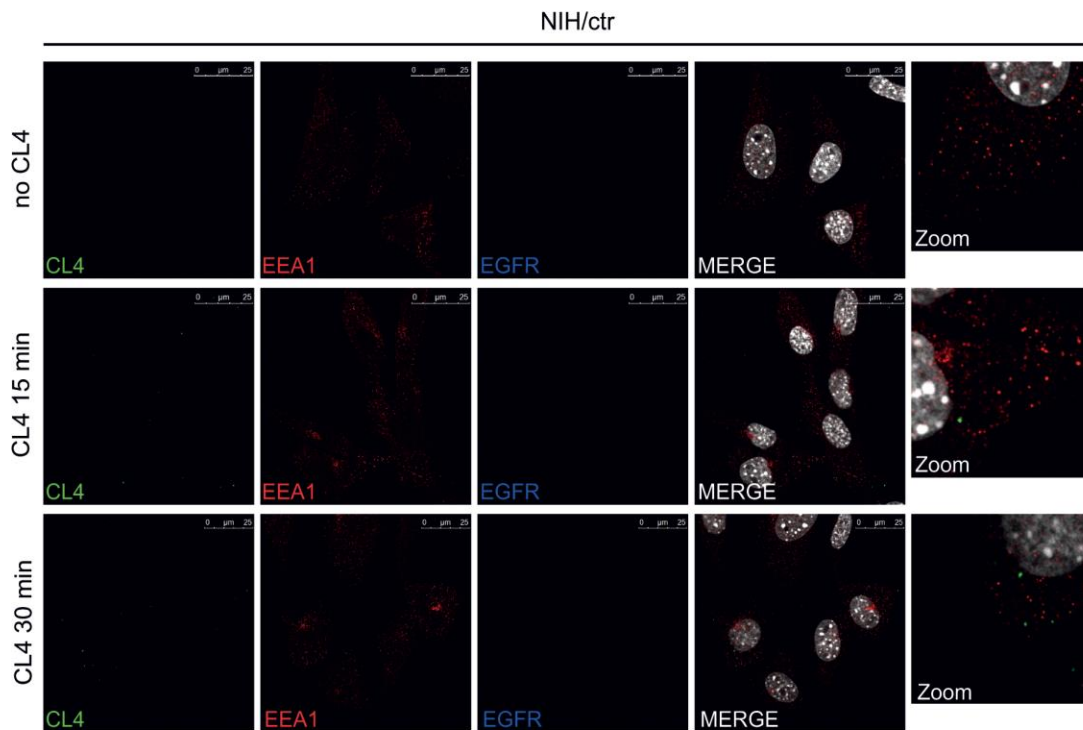

**Figure S3: CL4 EGFRvIII - bound colocalization with endosome compartment .** (A) NIH/EGFRvIII cells were incubated with 2.5  $\mu\text{mol/l}$  FAM-labelled CL4, as reported in the legend to Figure 1C . Cells were fixed, permeabilized and labelled with anti-EGFR and anti-EEA1 antibodies. A single focus “XY” from a Z-stack is shown indicating the plane in which CL4 EGFRvIII - bound colocalizes with EEA1 at 15 minutes incubation. Orthogonal projections of X and Y axis are also shown to highlight colocalization. White arrow indicates one of the colocalization puncta between CL4 EGFRvIII - bound colocalized with EEA1 as highlighted in the orthogonal projections . (B) NIH/ctr, were incubated with 2.5  $\mu\text{mol/l}$  FAM-labelled CL4 for 15 and 30 minutes, fixed, permeabilized and labelled with anti-EGFR and anti-EEA1 antibodies. CL4, EEA1, EGFRvIII and nuclei are visualized in green, red, blue and grey, respectively.

**A**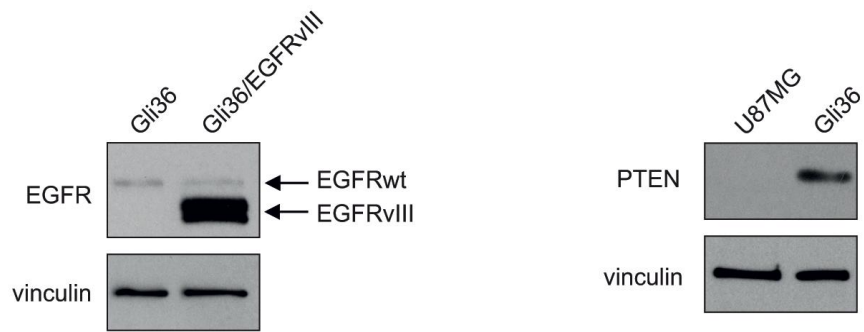**B**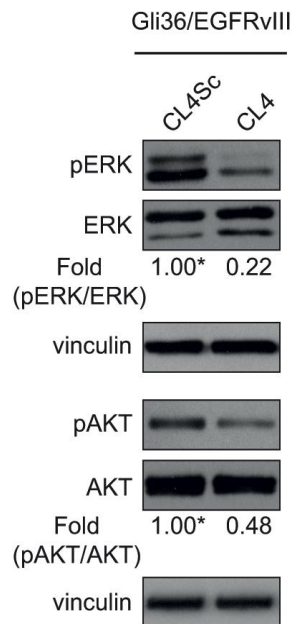

**Figure S4: CL4 inhibits ERK and AKT activation in Gli36/EGFRvIII cells.** (A) Lysates from the indicated cell lines were immunoblotted with anti - EGFR (left) or PTEN (right) antibody. (B) Lysates from Gli36/EGFRvIII cells treated with 200 nmol/l CL4 or CL4Sc for 30 minutes were immunoblotted with anti -pERK and anti -pAKT antibodies, as indicated. Filters were stripped and reprobed with anti-ERK and anti -AKT antibodies. A vinculin loading control is included. Values below the blot indicate signal levels reported as relative to CL4Sc, arbitrarily set to 1 (labeled with asterisk).

U87MG/EGFRvIII

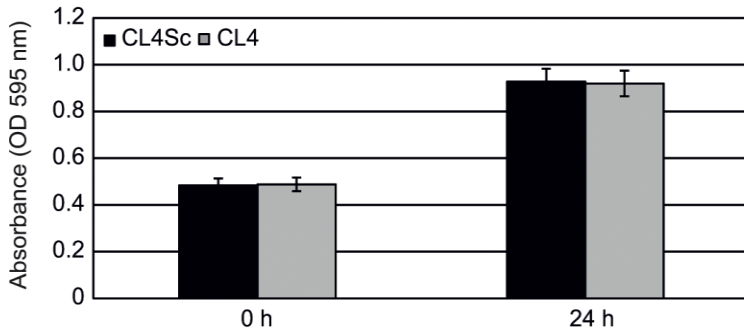

Gli36/EGFRvIII

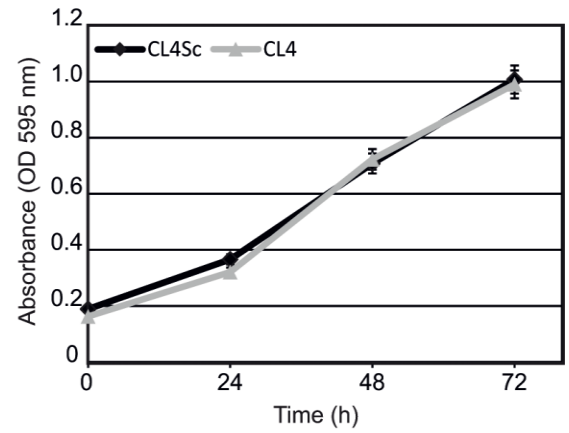

**Figure S5: Proliferation rate in U87MG/EGFRvIII and Gli36/EGFRvIII cells after seeding.** The indicated cell lines were serum-starved overnight in the presence of 200 nmol/l CL4 or CL4Sc and plated ( $5 \times 10^4$  cells) in each well of a 24-well plate in the presence of the above treatments. At the indicated time points, cells were stained with crystal violet. Mean values  $\pm$  SD ( $n = 3$ ) of absorbance at 595 nm of the stained cells are reported.

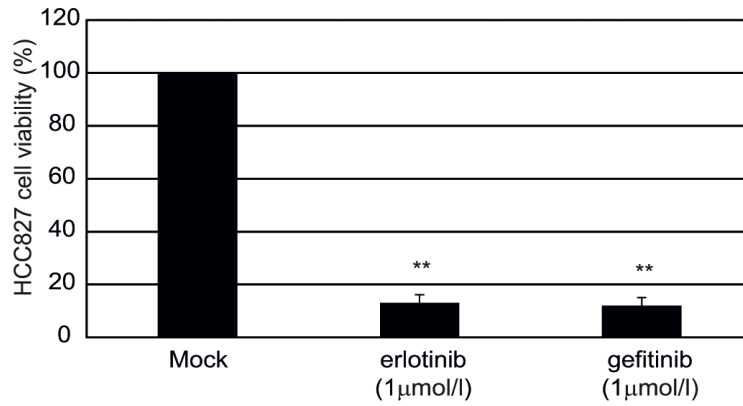

**Figure S6 : HCC827 cells are sensitive to EGFR-TKIs.** HCC827 cells were mock - treated or treated for 72 hours with 1 μmol/l erlotinib or gefitinib. Cell viability was analyzed and expressed as percent of viable treated cells with respect to mock - treated cells. Bars depict mean ± SD ( $n = 3$ ). \*\* $P < 0.01$  relative to mock-treated.
